# Supplementary material
Source: Springer Nature journal article supplement (https://www.springermedizin.de/resource/supplementary/12955_2006_316_MOESM1_ESM.pdf/9560140)

Worse Better

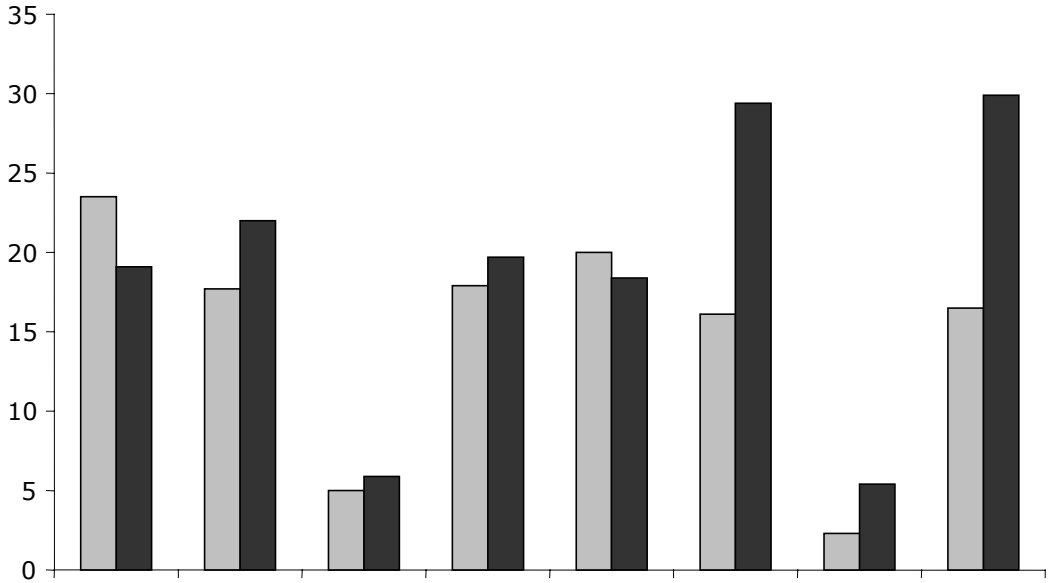

**p value**

PF 0.44 BP 0.61 RP 0.68 GH 0.81 SF 0.50 VT 0.003 RE 0.09 MH 0.001

Supplement: MOESM1 [file 9560140]
